# Supplementary material for: Functional characterization of maize heat shock transcription factor gene ZmHsf01 in thermotolerance
Source: PubMed Central journal article supplement (PMC7153558; doi:10.7717/peerj.8926), 2020-04-10
Supplement: peerj-08-8926-s001.pdf [file peerj-08-8926-s001.pdf]

1 ATGGACCTGATGCTGCCGGTGACGGTAAAGGAGGAGTGGCCTCCGGAGGAGGAGGAGGTG  
1 M D L M L P V T V K E E W P P E E E E V  
61 GTGGTGGTGGAGGAGGAGGAGGAGGACGTGGACCGGACCGGACGCTCCGCGGCCGATG  
21 V V V E E E E E D V D A D A D A P R P M  
121 GAGGGGCTGCACGAGGTCCGGCCACCGCCGTTCTTGACCAAGACGTTTCGACCTGGTGGCC  
41 E G L H E V G P P P F L T K T F D L V A  
181 GACCCGGCCACCGACGACGTCACTCTCTGGGGCCGCGCCGGCAACAGCTTCGTGGTCTGG  
61 D P A T D D V I S W G R A G N S F V V W  
241 GATCCCCACGTGTTTCGCCCGGTGCTGCTCCCCAGGTTCTTTAAGCACAACAACCTTCTCC  
81 D P H V F A A V L L P R F F K H N N F S  
301 AGCTTTGTCCGCCAGCTGAACACCTATGGCTTCAGAAAGATCGACCCGGACAGCTGGGAG  
101 S F V R Q L N T Y G F R K I D P D S W E  
361 TTCGCGAACGAAGGATTCCTGAGGGGCCAGAGGCATCTTCTCCGGCTGATCAAGCGTCCG  
121 F A N E G F L R G Q R H L L R L I K R R  
421 AGGCCGGCGCCGCCGCCCGCTACCTCCAGGCGTCGCAGTCGCAGGGGTTCGTGCCTGGAG  
141 R P A P P P P Y L Q A S Q S Q G S C L E  
481 GTGGGCCGTTTCGGGGGGCTGGACGGAGAGATGGAGCGGCTGAGGCGCGACAAAAGCATC  
161 V G R F G G L D G E M E R L R R D K S I  
541 CTGCTGGCGGAGGTGGTGAAGCTGCGGCAGGAGCAGCAGAGCACGCGGGCGGACATGCGG  
181 L L A E V V K L R Q E Q Q S T R A D M R  
601 GCCATGGAGGAGCGGCTGCGGCACGCGGAGCACAAGCAGGTGCAGATGATGGGGTTCCTG  
201 A M E E R L R H A E H K Q V Q M M G F L  
661 GCGCGGGCGGTGCAGAGCCCGGACTTGTTCAGCTGCTGGCCCAGCAGCAGGGCAGGGCGG  
221 A R A V Q S P D L F Q L L A Q Q Q G R R  
721 AGGGAGCTGGAGGGCGCGGCGTCTCTCCGCCCTCCCGGAAGCGGAGGCGGCCCATC  
241 R E L E G A A L L S A A S R K R R R P I  
781 GCGCGCGCGCCGCCAACGGCGGCTTGACGAGCAGGAGGAGGAGCAGCAGCAGGGCGAC  
261 G A A P A N G G L Q Q Q E E E Q Q Q G D  
841 GACGACGACCCACCGCCACGCGGGCGTGTTCGCGGAGCTGGACGAGCGAGGGACCACG  
281 D D D P T A T R A L F A E L D E R G T T  
901 TCGGAGCTGGAGAACCTGGCGCTCAACATCCAGGGGCTCGGCAAGCGCAGGCAGGACGGG  
301 S E L E N L A L N I Q G L G K R R Q D G  
961 AGCGAGAAGCAGGGTGGCCGCGCGGAGCCAGCAGCAGGGCGGGTTCGAGACGGCGGAG  
321 S E K Q G G R A R S Q Q Q G G F E T A E  
1021 CTCACCGACGACTTTTGGGAGGAGCTGCTGAACGAAGGGATGAAGGGCGGTGCCGAGGCT  
341 L T D D F W E E L L N E G M K G G A E A  
1081 GAGACGCTGCCGCCGAGAGGAGACGACCGGCTTGGTACGTCGACGCGCTGGCGCAGAAG  
361 E T L P P E R R R P A W Y V D A L A Q K  
1141 TTGAGCTCCATGAGCAATAACACCACGGCGAAGTAG  
381 L S S M S N N T T A K \*
