# Supplementary material for: Functional characterization of maize heat shock transcription factor gene ZmHsf01 in thermotolerance
Source: PubMed Central journal article supplement (PMC7153558; doi:10.7717/peerj.8926), 2020-04-10
Supplement: peerj-08-8926-s002.pdf [file peerj-08-8926-s002.pdf]

| Gene<br>Name     | Accession<br>number | Forward                  | Reverse                |
|------------------|---------------------|--------------------------|------------------------|
| <i>ZmHsf01</i>   | MK888854            | AGAACCTGGCGCTCAACA       | TCAGCAGCTCCTCCCAA      |
| <i>AtHsp18.2</i> | At5g59720           | GCAGATTAGCGGAGAGAGGA     | CCTTCACTTCTTCCATCTTTGC |
| <i>AtHsp21</i>   | At4g27670           | AAGTCCGCTACACCGTTCTC     | CCAACAATCCGAAAGGAGAG   |
| <i>AtERDJ3A</i>  | At3g08970           | CTCCTGTTTGTATCATTGGTGC   | TGTGTCCTGAGAACCTGTGG   |
| <i>AtHsa32</i>   | At4g21320           | GCGAAGTTGGTTGAGTGGTT     | GGAGGAACTGAGAACAGATTGG |
| <i>AtHsp70b</i>  | At1g16030           | TCCGCTTAGCCTTGGACTT      | ACGCCTGGTTGATTGTCTG    |
| <i>AtHsp70T</i>  | At2g32120           | TGATTGAGGTGAGGATGCC      | CCACTTCAACGACAAACCC    |
| <i>AtHsp90.1</i> | At5g52640           | CCCTCTCTTCTTCATAAATCAACA | CCATCGCAACGAACTTTG     |
| <i>AtHsp101</i>  | At1g74310           | TGTCTTCAACACTCTGCTCCA    | CACTTCCATTGTTACTTTCCAG |
| <i>AtActin8</i>  | At1g49240           | CTCTCAATCGCATAACACCAGC   | ATCCACTAAGCACTTGCCTCA  |
