# Supplementary material for: Functional characterization of maize heat shock transcription factor gene ZmHsf01 in thermotolerance
Source: PeerJ. 2020 Apr 10;8:e8926. doi: 10.7717/peerj.8926 (PMC7153558; doi:10.7717/peerj.8926)
Supplement: Table S2 — Abiotic stresses include heat stress, ABA, and H2O2. A, Expression levels of ZmHsf01 in different tissues and organs under normal growth conditions. B and C, Expression levels of ZmHsf01 in leaves and roots of maize seedlings after 42 °C heat shock. D and E, Expression levels of ZmHsf01 in leaves and roots of maize seedlings after 200μ M ABA treatment. F and G, Expression levels of ZmHsf01 in leaves and roots of maize seedlings after 10 mM H2O2 treatment. There were three biological repeats for each sample and the data mean ± standard error. [file peerj-08-8926-s003.xlsx]

## Sheet: Figure3
Figure3A_raw_data	three repeated test			mean	SD
Young roots	1	1	1	1	0
Young shoots	1.50361	3.83768	4.86471	3.402	1.72239
Young leaves	26.6559	28.7644	33.4385	29.6196	3.47123
mature leaves	13.6426	15.3694	18.4912	15.8344	2.45751
Pollens	2.28349	2.77224	2.22787	2.42787	0.299534
Ears	0.158932	0.223179	0.435908	0.272673	0.14497
Immature embyros	0.12654	0.30484	0.513607	0.314996	0.193733
Figure3B_raw_data
	three repeated test			mean	SD
0	1	1	1	1	0
10	39.1967	26.1903	18.2436	27.8769	10.5778
30	105.7	120.776	92.3785	106.285	14.2079
40	79.2366	68.5731	78.6257	75.4784	5.98803
50	16.1957	12.2792	16.6704	15.0484	2.40995
60	16.0081	5.48956	5.56471	9.02081	6.05133
120	3.0863	2.61407	2.81809	2.83949	0.236841
Figure3C_raw_data
	three repeated test			mean	SD
0	1	1	1	1	0
10	20.6503	23.4389	26.5208	23.5367	2.93649
30	145.681	145.783	146.372	145.945	0.372871
40	117.037	128.322	113.752	119.704	7.64249
50	78.4688	112.132	104.407	98.3358	17.6337
60	15.2193	19.5577	18.8885	17.8885	2.33568
120	2.54992	7.17781	6.36386	5.36386	2.4707
Figure3D_raw_data	three repeated test			mean	SD
0	1	1	1	1	0
2	0.348801	0.454017	0.237449	0.346756	0.108299
4	0.0529317	0.109105	0.0808453	0.0809608	0.028087
6	0.0589827	0.0993367	0.0557333	0.0713509	0.0242908
12	0.0148939	0.0664996	0.0554822	0.0456252	0.0271783
24	0.0764224	0.0835373	0.0410591	0.0670063	0.0227508
36	0.00446917	0.00268715	0.00531756	0.00415796	0.00134254
Figure3E_raw_data	three repeated test			mean	SD
0	1	1	1	1	0
2	3.34352	2.27609	3.51094	3.04352	0.669861
4	3.31784	2.02491	2.0409	2.46122	0.741901
6	4.36317	2.88315	2.5046	3.25031	0.98218
12	5.69673	2.30575	3.21527	3.73925	1.75516
24	20.4412	10.0449	8.9945	13.1602	6.32739
36	2.82167	4.54593	4.77019	4.04593	1.06615
Figure3F_raw_data	three repeated test			mean	SD
0	1	1	1	1	0
15	1.39958	1.1544	0.95683	1.17027	0.221802
30	0.45389	0.648214	0.541052	0.547719	0.0973335
60	0.593813	0.616747	0.611099	0.60722	0.0119491
90	0.516138	0.577972	0.60102	0.565043	0.0438929
120	0.139527	0.141501	0.121598	0.134209	0.0109652
240	0.109806	0.196522	0.0980904	0.134806	0.0537675
Figure3G_raw_data	three repeated test			mean	SD
0	1	1	1	1	0
15	1.70376	1.87848	1.9032	1.82848	0.108715
30	0.688447	0.36036	0.483448	0.510752	0.165739
60	0.821171	1.26593	1.35068	1.14593	0.284421
90	1.28321	1.3652	1.38719	1.3452	0.0547989
120	1.54172	1.4393	1.53551	1.50551	0.0574239
240	0.375278	0.234439	0.396116	0.335278	0.0879482
