# Supplementary material for: Functional characterization of maize heat shock transcription factor gene ZmHsf01 in thermotolerance
Source: PeerJ. 2020 Apr 10;8:e8926. doi: 10.7717/peerj.8926 (PMC7153558; doi:10.7717/peerj.8926)
Supplement: Table S3 — qRT-PCR was performed on the Arabidopsis AtHsp18.2, AtHsp21, AtERDJ3A, AtHsfa32, AtHsp70b, AtHsp70T, AtHsp90, and AtHsp101 under BT and AT HS. We set the expression level of WT samples as 1. The reference gene Atactin8 (At1g49240) was used as an internal control to normalize the loading of different samples. Data means ± SD from three biological experiments. [file peerj-08-8926-s004.xlsx]

## Sheet: Figure10 (2)
	Figure8_raw_data
	AtHsp18.2 relative expression level				mean	SD			AtHsp21 relative expression level				mean	SD
	WT	1	1	1	1	0			WT	1	1	1	1	0
	BT-28_4	1.12275	1.18741	1.25176	1.18731	0.0645025			BT-28_4	1.01457	1.12438	0.900734	1.01323	0.111831
	BT-36_7	1.29431	1.33285	1.25586	1.29434	0.038495			BT-36_7	1.13285	1.304	0.982699	1.13985	0.160765
	WT	1	1	1	1	0			WT	1	1	1	1	0
	AT-28_4	1.37757	1.49776	1.29757	1.39096	0.100765			AT-28_4	1.14135	1.18788	1.21346	1.1809	0.0365554
	AT-36_7	1.49097	1.61265	1.36456	1.4894	0.124053			AT-36_7	1.26005	1.35109	1.20019	1.27044	0.075983
	AtERDJ3A relative expression level				mean	SD			AtHsa32 relative expression level				mean	SD
	WT	1	1	1	1	0			WT	1	1	1	1	0
	BT-28_4	1.11875	1.31178	1.23854	1.22302	0.0974504			BT-28_4	1.11755	1.21945	1.24945	1.19548	0.0691394
	BT-36_7	1.35418	1.85045	1.3285	1.51104	0.294215			BT-36_7	1.26699	1.32653	1.29962	1.29771	0.0298164
	WT	1	1	1	1	0			WT	1	1	1	1	0
	AT-28_4	1.36428	1.01724	1.22721	1.20291	0.174796			AT-28_4	1.38214	1.28967	1.14954	1.27378	0.117111
	AT-36_7	1.41784	1.56985	1.26549	1.41773	0.15218			AT-36_7	1.40707	1.66452	1.44916	1.50692	0.138101
	AtHsp70b relative expression level				mean	SD			AtHsp70T relative expression level				mean	SD
	WT	1	1	1	1	0			WT	1	1	1	1	0
	BT-28_4	1.49438	1.87145	1.57235	1.64606	0.199048			BT-28_4	1.42105	1.39134	1.55044	1.45428	0.0845913
	BT-36_7	2.00566	2.13667	1.90583	2.01605	0.11577			BT-36_7	1.56942	1.72593	1.55926	1.6182	0.0934303
	WT	1	1	1	1	0			WT	1	1	1	1	0
	AT-28_4	0.991354	1.35287	0.983423	1.10921	0.211047			AT-28_4	1.71878	1.88535	1.82843	1.81085	0.0846678
	AT-36_7	1.09536	1.2066	1.02652	1.10949	0.0908668			AT-36_7	2.4901	2.42011	2.30004	2.40341	0.0961248
	AtHsp90 relative expression level				mean	SD			AtHsp101 relative expression level				mean	SD
	WT	1	1	1	1	0			WT	1	1	1	1	0
	BT-28_4	1.07354	1.12135	1.35523	1.18337	0.150744			BT-28_4	1.52115	1.43205	1.72045	1.55788	0.147663
	BT-36_7	1.04564	1.97145	1.17802	1.39837	0.500694			BT-36_7	2.10022	2.30066	2.05629	2.15239	0.13027
	WT	1	1	1	1	0			WT	1	1	1	1	0
	AT-28_4	1.90132	1.84014	2.14938	1.96361	0.163764			AT-28_4	1.14833	1.12153	1.27272	1.18086	0.0806777
	AT-36_7	2.17832	2.2563	2.09141	2.17535	0.0824811			AT-36_7	1.28217	1.502	1.18395	1.32271	0.162853
